# Supplementary material for: Alzheimer Dementia Among Individuals With Down Syndrome
Source: PubMed Central journal article supplement (PMC11420697; doi:10.1001/jamanetworkopen.2024.35018), 2024-09-23

## Supplemental Online Content

Rubenstein E, Tewolde S, Michals A, et al. A population study of Alzheimer dementia in Down syndrome . *JAMA Netw Open*. 2024;7(9):e2435018.  
doi:10.1001/jamanetworkopen.2024.35018

**eAppendix 1.** *International Classification of Diseases, Ninth Revision (ICD-9) and Tenth Revision (ICD-10) Codes for Down Syndrome*

**eAppendix 2.** Algorithm for Alzheimer's disease

**eTable 1.** Bias Analysis Assessing Misclassification of Alzheimer's Dementia in Medicaid Compared With Medicare

**eTable2.** Incidence Rate by Year and Demographics Among Adults With Down Syndrome

**eTable 3.** Age at Incident Alzheimer Dementia and Age at Death With Alzheimer's Dementia in Medicaid and Medicare Enrolled Adults With Down Syndrome, 2011-2019

**eTable 4.** Assessment of Imputation For Missing Race Among Medicaid Enrollees With Down Syndrome

**eFigure 1.** Alzheimer Dementia Incidence Among Those With Down Syndrome by Whether We Restrict to Those Entering the Study Younger Than Age 65 Years

**eFigure 2.** Age Distribution Comparing Age at Death For Adults With Down Syndrome With and Without Alzheimer Dementia

This supplemental material has been provided by the authors to give readers additional information about their work.

eAppendix 1. *International Classification of Diseases, Ninth Revision (ICD-9) and Tenth Revision (ICD-10) Codes for Down Syndrome*

| <i>ICD-9</i> | <i>ICD-10</i>                |
|--------------|------------------------------|
| 758          | Q90                          |
|              | Q90.0                        |
|              | Q90.1 (Mosaic Down syndrome) |
|              | Q90.2 (Translocation)        |
|              | Q90.9 (Unspecified)          |

eAppendix 2. Algorithm For Alzheimer’s Disease

From <https://www2.ccwdata.org/web/guest/condition-categories-chronic>

| Valid ICD-9 Codes                                                                                                                                                                                          | Valid ICD-10 codes                                                                                                                                                              | Number / Types of claims                                           |
|------------------------------------------------------------------------------------------------------------------------------------------------------------------------------------------------------------|---------------------------------------------------------------------------------------------------------------------------------------------------------------------------------|--------------------------------------------------------------------|
| 331.0, 331.11, 331.19, 331.2, 331.7, 290.0, 290.10, 290.11, 290.12, 290.13, 290.20, 290.21, 290.3, 290.40, 290.41, 290.42, 290.43, 294.0, 294.10, 294.11, 294.20, 294.21, 294.8, 797 (any DX on the claim) | F01.50, F01.51, F02.80, F02.81, F03.90, F03.91, F04, F05, F06.1, F06.8, G13.8, G30.0, G30.1, G30.8, G30.9, G31.01, G31.09, G31.1, G31.2, G94, R41.81, R54 (any DX on the claim) | At least 1 inpatient, SNF, HHA, HOP, or Carrier claim with DX code |

SNF: skilled nursing facility;  
HHA: home health agency  
HOP: hospital outpatient.

eTable 1. Bias Analysis Assessing Misclassification of Alzheimer Dementia in Medicaid Compared With Medicare

1a. Sensitivity and specificity calculation by age group

|                 |                     |                 |                     |      |
|-----------------|---------------------|-----------------|---------------------|------|
|                 | Total               |                 |                     |      |
| <b>Age</b>      | 35-54               |                 |                     |      |
|                 |                     | <b>Medicaid</b> |                     |      |
|                 |                     | +               | -                   |      |
| <b>Medicare</b> | +                   | 18388           | 5982                |      |
|                 | -                   | 1092            | 32738               |      |
|                 |                     |                 |                     |      |
|                 | <b>Sensitivity=</b> | 0.75            | <b>Specificity=</b> | 0.97 |
|                 |                     |                 |                     |      |
| <b>Age</b>      | 44-54               |                 |                     |      |
|                 |                     | <b>Medicaid</b> |                     |      |
|                 |                     | +               | -                   |      |
| <b>Medicare</b> | +                   | 2744            | 1136                |      |
|                 | -                   | 261             | 9046                |      |
|                 |                     |                 |                     |      |
|                 | <b>Sensitivity=</b> | 0.71            | <b>Specificity=</b> | 0.97 |
|                 |                     |                 |                     |      |
| <b>Age</b>      | 55-64               |                 |                     |      |
|                 |                     | <b>Medicaid</b> |                     |      |
|                 |                     | +               | -                   |      |
| <b>Medicare</b> | +                   | 9414            | 2786                |      |
|                 | -                   | 511             | 6572                |      |
|                 |                     |                 |                     |      |
|                 | <b>Sensitivity=</b> | 0.77            | <b>Specificity=</b> | 0.93 |
|                 |                     |                 |                     |      |
| <b>Age</b>      | 65+                 |                 |                     |      |
|                 |                     | <b>Medicaid</b> |                     |      |
|                 |                     | +               | -                   |      |
| <b>Medicare</b> | +                   | 5305            | 1617                |      |
|                 | -                   | 234             | 1815                |      |
|                 |                     |                 |                     |      |
|                 | <b>Sensitivity=</b> | 0.77            | <b>Specificity=</b> | 0.89 |
|                 |                     |                 |                     |      |

1b. Calculations for correction of misclassification in Medicaid

| Age   | Full N+ | Full N- | No Medicaid N+ | No Medicaid N- | Corrected N+ | Corrected N- | %     |
|-------|---------|---------|----------------|----------------|--------------|--------------|-------|
| 35-44 | 5043    | 18204   | 4522           | 11865          | 4985         | 18261        | 1.14  |
| 45-54 | 14855   | 11621   | 13866          | 9039           | 14921        | 11554        | -0.45 |
| 55-64 | 8811    | 4125    | 8213           | 3157           | 8858         | 4077         | -0.53 |

Full= full Medicaid + Medicare Sample

No Medicaid= Cases and non cases with any Medicare claims

Corrected- Total cases we would expect correcting for imperfect sensitivity and specificity in Medicaid claims

eTable 2. Incidence Rate by Year and Demographics Among Adults With Down Syndrome

|                                 | 2012 |        | 2013 |        | 2014 |       | 2015 |       | 2016 |        | 2017 |        | 2018 |        | 2019 |        |
|---------------------------------|------|--------|------|--------|------|-------|------|-------|------|--------|------|--------|------|--------|------|--------|
|                                 | PY   | 85 486 | PY   | 88 513 | PY   | 91846 | PY   | 94292 | PY   | 95 523 | PY   | 95 818 | PY   | 95 824 | PY   | 94 757 |
|                                 | N    | Rate   | N    | Rate   | N    | Rate  | N    | Rate  | N    | Rate   | N    | Rate   | N    | Rate   | N    | Rate   |
| <b>Any Alzheimer’s dementia</b> | 2062 | 24.1   | 2120 | 24.0   | 2058 | 22.4  | 2195 | 23.3  | 2238 | 23.4   | 2105 | 22.0   | 2010 | 21.0   | 1798 | 19.0   |
| <b>Sex</b>                      |      |        |      |        |      |       |      |       |      |        |      |        |      |        |      |        |
| Male                            | 1140 | 24.9   | 1148 | 24.3   | 1105 | 22.6  | 1145 | 22.9  | 1191 | 23.5   | 1126 | 22.2   | 1034 | 20.4   | 990  | 19.9   |
| Female                          | 922  | 23.2   | 972  | 23.5   | 953  | 22.2  | 1050 | 23.8  | 1047 | 23.3   | 979  | 21.7   | 976  | 21.6   | 808  | 18.0   |
| <b>Age</b>                      |      |        |      |        |      |       |      |       |      |        |      |        |      |        |      |        |
| <35                             |      |        |      |        |      |       |      |       |      |        |      |        |      |        |      |        |
| 35-44                           | 206  | 11.6   | 204  | 11.4   | 163  | 9.0   | 201  | 11.0  | 221  | 12.0   | 199  | 10.7   | 164  | 8.8    | 183  | 9.6    |
| 45-54                           | 886  | 44.4   | 906  | 45.4   | 856  | 43.1  | 852  | 43.3  | 851  | 44.4   | 814  | 43.9   | 736  | 41.2   | 593  | 34.8   |
| 55-64                           | 811  | 94.4   | 800  | 83.4   | 850  | 80.4  | 917  | 80.4  | 950  | 79.1   | 872  | 70.3   | 893  | 70.8   | 797  | 63.3   |
| 65+                             | 159  | 68.0   | 210  | 79.2   | 189  | 65.5  | 225  | 72.8  | 216  | 144.9  | 220  | 64.3   | 217  | 62.0   | 225  | 62.6   |
| Mean age, SD                    | 54.1 | 7.6    | 54.2 | 7.8    | 54.8 | 7.8   | 54.9 | 7.8   | 54.8 | 8.1    | 55   | 8.0    | 55.6 | 8.2    | 55.5 | 8.7    |
| Median age, SD                  | 54   | 10.0   | 54   | 10.0   | 55   | 9.0   | 55   | 9.0   | 55   | 9.0    | 55   | 9.0    | 55   | 9.0    | 56   | 10.0   |
| <b>Race ethnicity</b>           |      |        |      |        |      |       |      |       |      |        |      |        |      |        |      |        |
| Non-Hispanic White              | 1704 | 29.6   | 1748 | 29.6   | 1687 | 27.9  | 1772 | 29.0  | 1829 | 29.8   | 1670 | 27.4   | 1607 | 26.6   | 1397 | 23.5   |
| Black                           | 193  | 18.8   | 199  | 18.7   | 191  | 17.4  | 192  | 17.1  | 171  | 15.1   | 224  | 19.7   | 168  | 14.7   | 174  | 15.4   |
| Mixed race / Other              | 11   | 9.0    | 14   | 10.8   |      |       | 22   | 14.7  | 28   | 18.3   | 19   | 12.2   | 26   | 16.7   | 13   | 8.3    |
| Asian / PI                      | 18   | 8.5    | 22   | 9.8    | 15   | 6.4   | 27   | 10.9  | 21   | 8.2    | 31   | 11.7   | 28   | 10.3   | 39   | 14.2   |
| Native                          |      |        | 10   | 13.1   |      |       | 15   | 18.1  | 18   | 21.5   | 10   | 11.8   |      |        | 13   | 15.3   |
| Hispanic                        | 114  | 9.0    | 114  | 8.4    | 132  | 9.2   | 152  | 9.8   | 152  | 9.5    | 140  | 8.5    | 165  | 9.8    | 149  | 8.7    |
| <b>Enrollment</b>               |      |        |      |        |      |       |      |       |      |        |      |        |      |        |      |        |
| Medicaid only                   | 220  | 5.9    | 190  | 4.8    | 231  | 5.4   | 254  | 5.6   | 301  | 6.5    | 305  | 6.4    | 255  | 5.2    | 277  | 5.6    |
| Dual enrolled                   | 1579 | 45.0   | 1640 | 45.3   | 1588 | 41.9  | 1669 | 43.1  | 1727 | 44.5   | 1561 | 40.8   | 1528 | 40.4   | 1305 | 35.8   |
| Medicare only                   | 263  | 20.4   | 290  | 23.0   | 239  | 21.1  | 242  | 23.1  | 210  | 20.7   | 239  | 23.7   | 227  | 24.2   | 216  | 23.9   |

PY: Person years  
 PI: Pacific Islander  
 Rates per 1000 person years  
 Cells <10 are suppressed

eFigure 1. Alzheimer Dementia Incidence Among Those With Down Syndrome by Whether We Restrict to Those Entering the Study Younger Than Age 65 Years

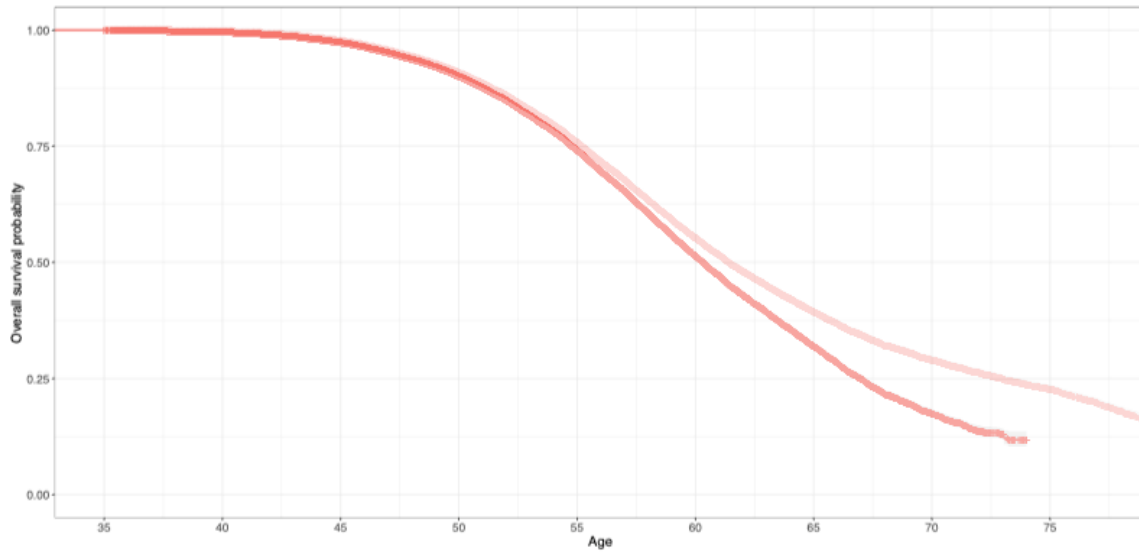

Darker red: restricted to those entering the study  $\leq$  65 years of age  
Lighter red: full sample  
N=2780 excluded; 2.1% of full sample

eTable 3. Age at incident Alzheimer’s dementia and age at death with Alzheimer’s dementia in Medicaid and Medicare enrolled adults with Down syndrome, 2011-2019

|                         | Age at incident Alzheimer’s dementia |            |              | Age at death |            |              |
|-------------------------|--------------------------------------|------------|--------------|--------------|------------|--------------|
|                         | N                                    | Mean (SD)  | Median (IQR) | N            | Mean (SD)  | Median (IQR) |
| <b>Total</b>            | 16392                                | 54.5 (7.4) | 54.6 (9.3)   | 15369        | 59.2 (6.9) | 59.0 (8)     |
| <b>Race / Ethnicity</b> |                                      |            |              |              |            |              |
| White                   | 13493                                | 55 (7.8)   | 54.9 (9.3)   | 13074        | 59.3 (6.8) | 59.0 (8)     |
| Black                   | 1 524                                | 55 (8.8)   | 54.9 (10.9)  | 1221         | 59.0 (8.0) | 58.4 (10)    |
| Hispanic                | 1 122                                | 54.2 (9.2) | 53.8 (10.9)  | 731          | 58.5 (7.8) | 58.9 (10)    |
| Mixed race              | 142                                  | 52.8 (8.2) | 54.5 (10.7)  | 97           | 58.2 (7.0) | 58.6 (8)     |
| Asian / PI              | 203                                  | 54.1 (9.2) | 54.0 (11.5)  | 101          | 59.9 (7.7) | 60.0 (8)     |
| Native                  | 88                                   | 52.4 (7.8) | 52.3 (9.6)   | 63           | 57.8 (7.1) | 58.0 (9)     |

SD: Standard deviation  
IQR: Interquartile range

eTable 4. Assessment of imputation for missing race among Medicaid enrollees with Down syndrome.

|                |                    |               | % w/ Alzheimer's dementia |               | Age at Alzheimer's dementia |             |
|----------------|--------------------|---------------|---------------------------|---------------|-----------------------------|-------------|
|                | N after imputation | N not imputed | N after imputation        | N not imputed | Imputed                     | Not imputed |
| White          | 73803              | 59987         | 27.3                      | 27.2          | 54.5                        | 54.5        |
| Black          | 13758              | 10259         | 15.6                      | 14.3          | 54.5                        | 54.4        |
| PI             | 1036               | 261           | 13.4                      | 9.3           | 53.6                        | 56.0        |
| Asian          | 3521               | 2092          | 7.9                       | 8.5           | 54.4                        | 51.7        |
| Native America | 841                | 795           | 10.2                      | 10.6          | 51.6                        | 51.5        |
| Multiple       | 6573               | 1279          | 13.2                      | 6.9           | 56.8                        | 54.0        |

eFigure. Age distribution comparing age at death for adults with Down syndrome with and without Alzheimer's dementia

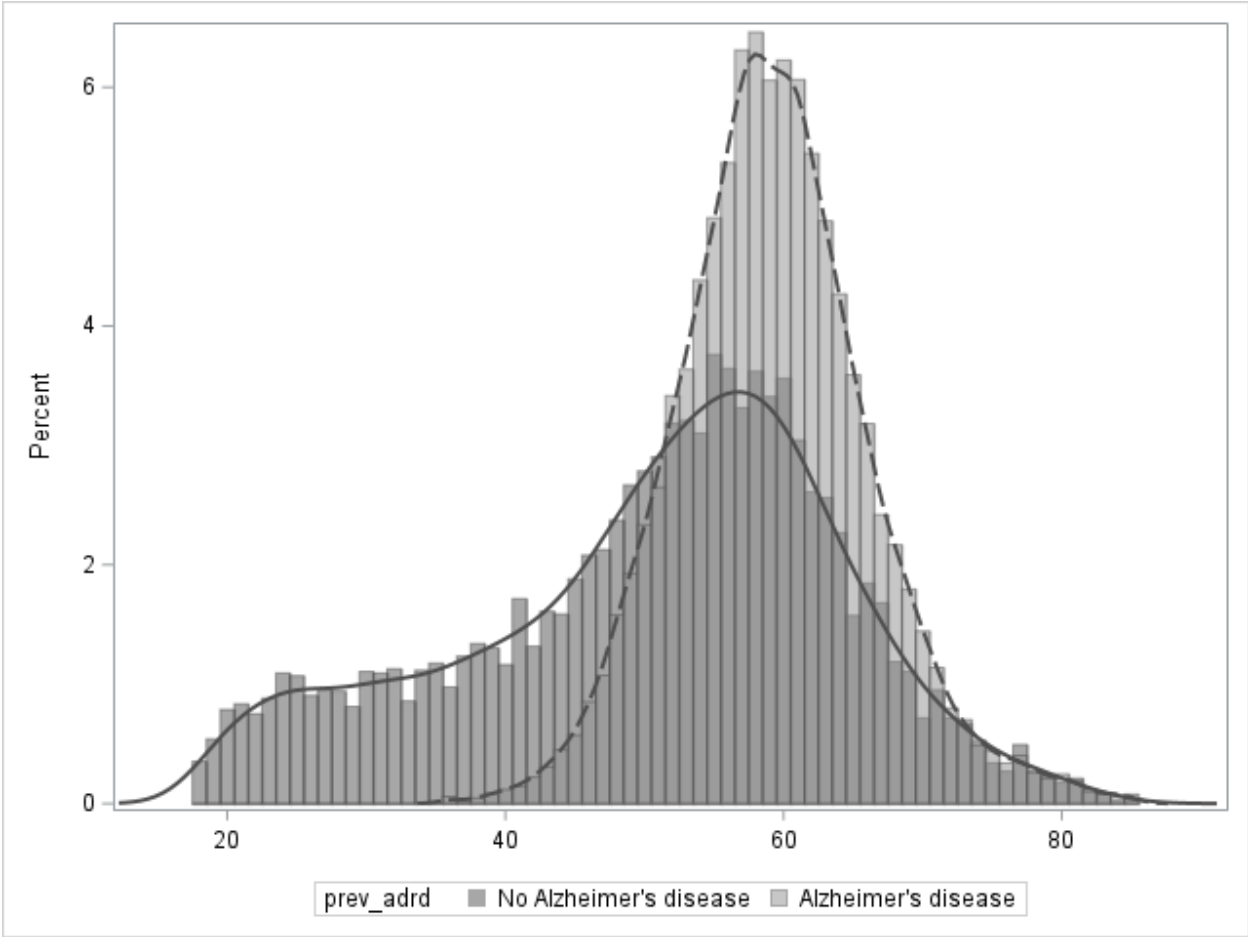

Supplement: jamanetwopen-e2435018-s001.pdf [file jamanetwopen-e2435018-s001.pdf]
