# Supplementary material for: Alzheimer Dementia Among Individuals With Down Syndrome
Source: PubMed Central journal article supplement (PMC11420697; doi:10.1001/jamanetworkopen.2024.35018), 2024-09-23
Supplement: jamanetwopen-e2435018-s002.pdf [file jamanetwopen-e2435018-s002.pdf]

## Data Sharing Statement

Rubenstein. Alzheimer Dementia Among Individuals With Down Syndrome. *JAMA Netw Open*.  
Published September 23, 2024. doi:10.1001/jamanetworkopen.2024.35018

### Data

**Data available:** No

### Additional Information

**Explanation for why data not available:** Data are not able to be shared under a data use agreement with the Centers for Medicare and Medicaid Services.
